# Supplementary material for: QTL analysis of early stage heterosis for biomass in Arabidopsis
Source: PubMed Central journal article supplement — Theor Appl Genet. 2009 Jun 7;120(2):227–37. doi: 10.1007/s00122-009-1074-6 (PMC2793381; doi:10.1007/s00122-009-1074-6), 2009-06-07

Supplementary Figure 1: Genetic map based on SNP markers obtained from the reciprocal Col-0 x C24 / C24 x Col-0 RIL population.

New markers are indicated in red.

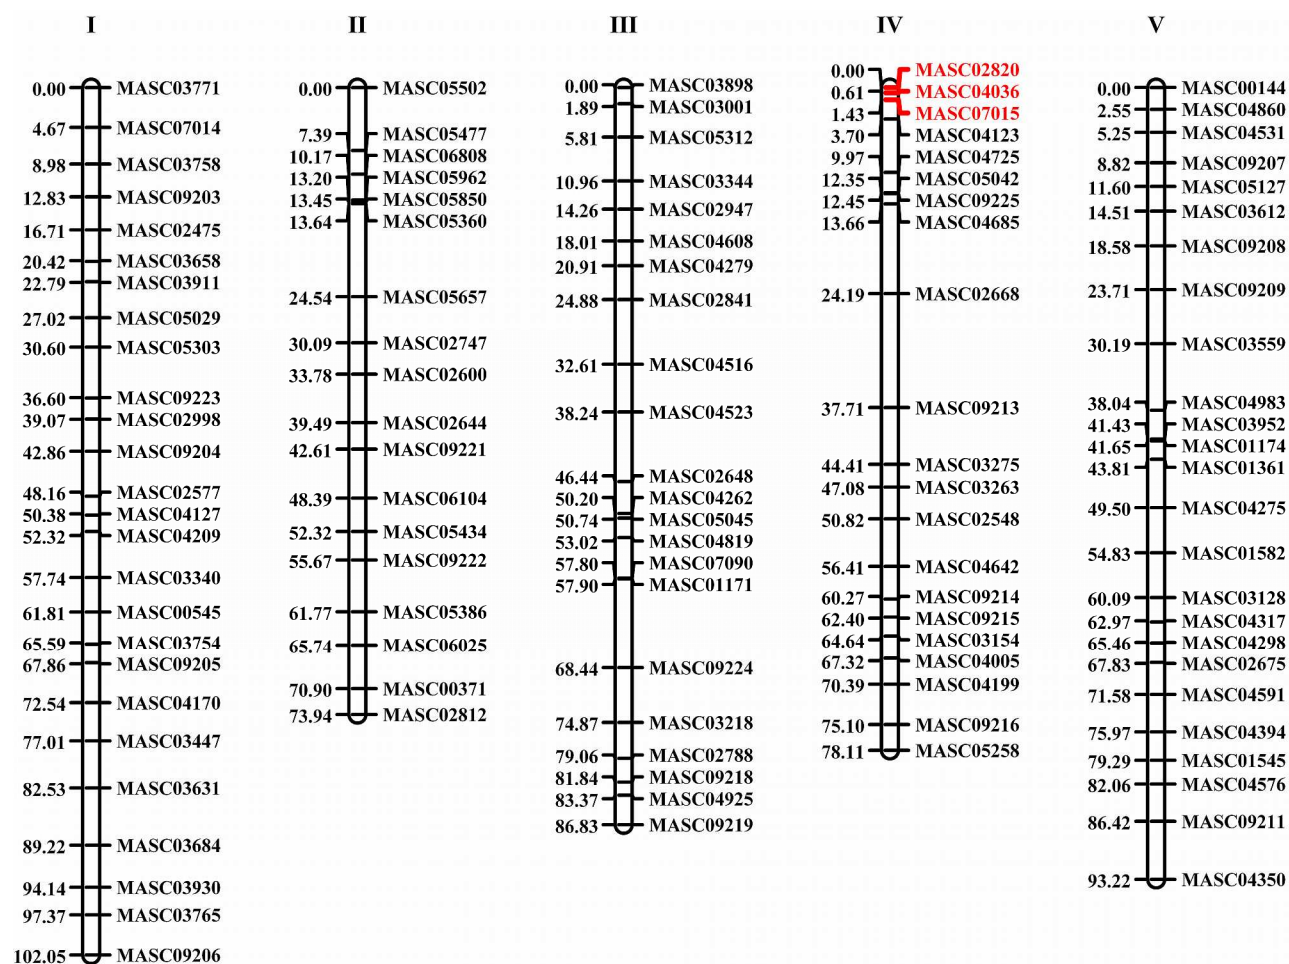

Supplement: 122_2009_1074_MOESM1_ESM.pdf [file 122_2009_1074_MOESM1_ESM.pdf]
