# Supplementary material for: QTL analysis of early stage heterosis for biomass in Arabidopsis
Source: PubMed Central journal article supplement — Theor Appl Genet. 2009 Jun 7;120(2):227–37. doi: 10.1007/s00122-009-1074-6 (PMC2793381; doi:10.1007/s00122-009-1074-6), 2009-06-07
Supplement: 122_2009_1074_MOESM2_ESM.pdf [file 122_2009_1074_MOESM2_ESM.pdf]

Supplementary Table 1: Mean trait *per se* values and associated standard errors in parents Col-0 and C24, reciprocal F<sub>1</sub> hybrids and RILs.

| trait                           | DW15 <sup>b</sup> | LA06 <sup>c</sup> | LA08 <sup>c</sup> | LA10 <sup>c</sup> |
|---------------------------------|-------------------|-------------------|-------------------|-------------------|
| Col-0                           | 1.265 ± 0.036     | 3.323 ± 0.125     | 7.805 ± 0.311     | 17.97 ± 0.633     |
| C24                             | 1.279 ± 0.029     | 2.815 ± 0.117     | 8.052 ± 0.315     | 17.95 ± 0.637     |
| F <sub>1</sub> -ColxC24         | 1.826 ± 0.044     | 4.077 ± 0.194     | 9.809 ± 0.413     | 22.13 ± 0.905     |
| F <sub>1</sub> -C24xCol         | 1.835 ± 0.044     | 3.915 ± 0.198     | 9.894 ± 0.447     | 22.86 ± 0.916     |
| RILs                            | 1.085 ± 0.010     | 2.456 ± 0.031     | 6.192 ± 0.070     | 13.74 ± 0.141     |
| h <sup>2</sup> (%) <sup>a</sup> | 42                | 58                | 59                | 53                |

<sup>a</sup> Broad sense heritability in %

<sup>b</sup> DW15 is the dry weight at 15 DAS in mg plant<sup>-1</sup>

<sup>c</sup> LAn refers to leaf area at n DAS in mm<sup>2</sup> plant<sup>-1</sup>
