# Supplementary material for: QTL analysis of early stage heterosis for biomass in Arabidopsis
Source: PubMed Central journal article supplement — Theor Appl Genet. 2009 Jun 7;120(2):227–37. doi: 10.1007/s00122-009-1074-6 (PMC2793381; doi:10.1007/s00122-009-1074-6), 2009-06-07
Supplement: 122_2009_1074_MOESM3_ESM.pdf [file 122_2009_1074_MOESM3_ESM.pdf]

Supplementary Table 2: Description of *per se* and derived ( $Z_1$ ,  $aMPH_{C24}$ ,  $aMPH_{Col}$ ) traits in RILs.

| Trait<br>Contrast         | DW15 <sup>c</sup> |                       | LA06 <sup>d</sup> |                       |
|---------------------------|-------------------|-----------------------|-------------------|-----------------------|
|                           | Mean <sup>a</sup> | Variance <sup>b</sup> | Mean <sup>a</sup> | Variance <sup>b</sup> |
| per se                    | 1.085±0.010       | 0.041±0.003           | 2.456±0.031       | 0.410±0.030           |
| $Z_1$ <sup>e</sup>        | 1.581±0.009       | 0.034±0.002           | 3.446±0.034       | 0.458±0.028           |
| $aMPH_{C24}$ <sup>f</sup> | 0.422±0.010       | 0.040±0.003           | 0.719±0.039       | 0.636±0.044           |
| $aMPH_{Col}$ <sup>f</sup> | 0.394±0.014       | 0.077±0.005           | 0.755±0.048       | 0.911±0.061           |
| $Z_2$ <sup>e</sup>        | 0.037±0.014       | 0.082±0.005           | -0.241±0.048      | 0.919±0.061           |
|                           | LA08 <sup>d</sup> |                       | LA10 <sup>d</sup> |                       |
|                           | Mean <sup>a</sup> | Variance <sup>b</sup> | Mean <sup>a</sup> | Variance <sup>b</sup> |
|                           | 6.192±0.070       | 2.098±0.170           | 13.74±0.141       | 8.615±0.639           |
|                           | 8.894±0.076       | 2.276±0.241           | 19.85±0.157       | 9.734±0.600           |
|                           | 1.938±0.087       | 3.066±0.268           | 3.998±0.178       | 12.90±1.159           |
|                           | 1.823±0.102       | 4.168±0.315           | 3.933±0.216       | 18.55±1.334           |
|                           | 0.468±0.101       | 4.003±0.261           | 0.710±0.210       | 17.30±1.134           |

<sup>a</sup> Arithmetic mean across RILs ± standard error

<sup>b</sup> Variance across RILs ± standard error

<sup>c</sup> Shoot dry weight at 15 DAS in mg plant<sup>-1</sup>

<sup>d</sup> LAN: leaf area at n DAS in mm<sup>2</sup> plant<sup>-1</sup>

<sup>e</sup> Linear contrasts estimating augmented additive ( $Z_1$ ) and augmented dominance ( $Z_2$ ) effect

<sup>f</sup> Absolute mid-parent-heterosis in crosses with C24 and Col-0, respectively
