# Supplementary material for: QTL analysis of early stage heterosis for biomass in Arabidopsis
Source: PubMed Central journal article supplement — Theor Appl Genet. 2009 Jun 7;120(2):227–37. doi: 10.1007/s00122-009-1074-6 (PMC2793381; doi:10.1007/s00122-009-1074-6), 2009-06-07
Supplement: 122_2009_1074_MOESM4_ESM.pdf [file 122_2009_1074_MOESM4_ESM.pdf]

Supplementary Table 3: List of *per se* and heterotic QTL identified in RILs and RIL-TCs.

| Trait | QTL                 | Peak <sup>a</sup> | SI <sup>b</sup> | Marker <sup>c</sup> | LOD <sup>d</sup> | pR <sup>2e</sup> | StdEff <sup>f</sup> | R <sup>2g</sup> | SD <sup>g</sup> |
|-------|---------------------|-------------------|-----------------|---------------------|------------------|------------------|---------------------|-----------------|-----------------|
| DW15  | per se              | 1/10              | 4-14            | MASC03758           | 2.21             | 2.35             | 0.15                | 20.2            | 3.5             |
|       |                     | 1/90              | 82-94           | MASC03684           | 1.83             | 1.95             | -0.13               |                 |                 |
|       |                     | 3/8               | 4-12            | MASC05312           | 6.41             | 6.65             | 0.26                |                 |                 |
|       |                     | 3/60              | 52-68           | MASC01171           | 3.41             | 3.60             | -0.21               |                 |                 |
|       |                     | 4/4               | 0-8             | MASC04123           | 5.03             | 5.25             | -0.22               |                 |                 |
|       |                     | 4/54              | 46-58           | MASC02548           | 3.61             | 3.80             | -0.20               |                 |                 |
|       |                     | 5/86              | 82-92           | MASC04576           | 3.23             | 3.40             | 0.19                |                 |                 |
|       | aMPH <sub>C24</sub> | 1/24              | 20-28           | MASC03911           | 2.36             | 2.55             | -0.15               | 20.6            | 3.5             |
|       |                     | 1/92              | 84-96           | MASC03684           | 4.72             | 5.02             | -0.22               |                 |                 |
|       |                     | 2/46              | 42-54           | MASC09221           | 3.84             | 4.10             | -0.20               |                 |                 |
|       |                     | 3/56              | 52-64           | MASC04819           | 6.52             | 6.87             | -0.29               |                 |                 |
|       |                     | 4/4               | 2-13            | MASC04123           | 1.92             | 2.08             | 0.13                |                 |                 |
|       | aMPH <sub>Col</sub> | 4/4               | 2-6             | MASC04123           | 17.96            | 18.03            | 0.44                | 18.0            | 3.4             |
|       | Z <sub>1</sub>      | 1/90              | 86-94           | MASC03684           | 8.37             | 8.95             | -0.30               | 18.9            | 3.5             |
|       |                     | 3/54              | 50-58           | MASC04819           | 2.66             | 2.93             | -0.18               |                 |                 |
|       |                     | 4/4               | 2-10            | MASC04123           | 7.32             | 7.87             | 0.27                |                 |                 |
|       |                     | 4/56              | 50-62           | MASC04642           | 2.96             | 3.26             | -0.17               |                 |                 |
|       | Z <sub>2</sub>      | 1/12              | 8-16            | MASC03758           | 4.60             | 5.03             | -0.20               | 30.5            | 3.8             |
| 2/56  |                     | 52-62             | MASC09222       | 4.88                | 5.32             | -0.20            |                     |                 |                 |
| 3/33  |                     | 32-38             | MASC04516       | 2.14                | 2.37             | -0.14            |                     |                 |                 |
| 3/62  |                     | 58-68             | MASC01171       | 5.04                | 5.50             | -0.26            |                     |                 |                 |
| 4/4   |                     | 2-6               | MASC04123       | 10.45               | 11.05            | -0.30            |                     |                 |                 |
| LA06  | per se              | 1/10              | 4-14            | MASC03758           | 2.43             | 2.59             | 0.16                | 17.6            | 3.3             |
|       |                     | 1/90              | 82-94           | MASC03684           | 1.76             | 1.88             | -0.13               |                 |                 |
|       |                     | 3/2               | 2-10            | MASC03001           | 2.63             | 2.79             | 0.16                |                 |                 |
|       |                     | 4/2               | 0-4             | MASC07015           | 2.32             | 2.47             | -0.15               |                 |                 |
|       |                     | 4/42              | 36-48           | MASC03275           | 5.99             | 6.26             | -0.27               |                 |                 |
|       |                     | 5/90              | 86-92           | MASC09211           | 2.08             | 2.22             | 0.16                |                 |                 |
|       | aMPH <sub>C24</sub> | 3/56              | 52-56           | MASC04819           | 2.15             | 2.42             | -0.18               | 2.4             | 1.5             |
|       | aMPH <sub>Col</sub> | 4/4               | 2-6             | MASC04123           | 12.16            | 13.22            | 0.37                | 13.2            | 3.2             |
|       | Z <sub>1</sub>      | 1/90              | 84-94           | MASC03684           | 4.38             | 5.03             | -0.23               | 11.3            | 3.0             |
|       |                     | 4/4               | 2-10            | MASC04123           | 5.65             | 6.44             | 0.25                |                 |                 |
|       | Z <sub>2</sub>      | 3/62              | 54-70           | MASC01171           | 3.35             | 3.87             | -0.23               | 10.9            | 3.0             |
| 4/4   |                     | 2-10              | MASC04123       | 4.57                | 5.24             | -0.23            |                     |                 |                 |

|                |                     |       |           |           |       |       |       |      |     |
|----------------|---------------------|-------|-----------|-----------|-------|-------|-------|------|-----|
|                |                     | 5/38  | 32-40     | MASC04983 | 2.50  | 2.90  | -0.16 |      |     |
| <b>LA08</b>    | per se              | 1/8   | 4-12      | MASC07014 | 2.86  | 3.03  | 0.17  | 15.2 | 3.2 |
|                |                     | 3/6   | 2-10      | MASC05312 | 5.62  | 5.87  | 0.24  |      |     |
|                |                     | 4/40  | 30-46     | MASC09213 | 6.05  | 6.30  | -0.26 |      |     |
|                |                     | 5/90  | 86-92     | MASC09211 | 3.06  | 3.24  | 0.19  |      |     |
|                | aMPH <sub>C24</sub> |       | 96-       |           |       |       |       | 5.4  | 2.2 |
|                |                     | 1/100 | 102       | MASC03765 | 2.54  | 2.86  | -0.18 |      |     |
|                |                     | 3/52  | 50-54     | MASC05045 | 2.45  | 2.76  | -0.18 |      |     |
|                | aMPH <sub>Col</sub> | 4/4   | 2-8       | MASC04123 | 11.93 | 12.99 | 0.37  | 13.0 | 3.2 |
|                | Z <sub>1</sub>      | 1/88  | 84-94     | MASC03631 | 4.45  | 5.10  | -0.23 | 10.8 | 3.0 |
|                |                     | 4/6   | 2-10      | MASC04123 | 5.08  | 5.81  | 0.25  |      |     |
|                | Z <sub>2</sub>      | 3/62  | 56-70     | MASC01171 | 4.03  | 4.64  | -0.26 | 11.0 | 3.0 |
|                |                     | 4/6   | 2-10      | MASC04123 | 4.25  | 4.88  | -0.23 |      |     |
| 5/38           |                     | 32-42 | MASC03559 | 2.24      | 2.60  | -0.16 |       |      |     |
| <b>LA10</b>    | per se              | 1/10  | 4-14      | MASC03758 | 2.08  | 2.22  | 0.15  | 14.7 | 3.2 |
|                |                     | 1/86  | 82-92     | MASC03631 | 2.47  | 2.62  | -0.17 |      |     |
|                |                     | 3/6   | 0-12      | MASC05312 | 4.77  | 5.00  | 0.22  |      |     |
|                |                     | 3/86  | 82-86     | MASC04925 | 3.25  | 3.43  | -0.19 |      |     |
|                |                     | 4/54  | 48-58     | MASC02548 | 3.35  | 3.54  | -0.19 |      |     |
|                | aMPH <sub>C24</sub> |       | 94-       |           |       |       |       | 5.1  | 2.1 |
|                |                     | 1/96  | 102       | MASC03631 | 2.80  | 3.14  | -0.19 |      |     |
|                |                     | 3/52  | 50-54     | MASC05045 | 1.94  | 2.19  | -0.16 |      |     |
|                | aMPH <sub>Col</sub> | 4/4   | 2-8       | MASC04123 | 11.20 | 12.24 | 0.36  | 12.2 | 3.1 |
|                | Z <sub>1</sub>      | 1/88  | 84-94     | MASC03631 | 5.60  | 6.38  | -0.26 | 14.1 | 3.3 |
|                |                     | 4/6   | 2-10      | MASC04123 | 5.53  | 6.31  | 0.26  |      |     |
|                |                     | 4/66  | 64-72     | MASC03154 | 2.06  | 2.40  | -0.15 |      |     |
| Z <sub>2</sub> | 3/64                | 56-72 | MASC01171 | 3.40      | 3.92  | -0.23 | 11.5  | 3.0  |     |
|                | 4/4                 | 2-10  | MASC04123 | 4.75      | 5.45  | -0.23 |       |      |     |
|                | 5/38                | 34-42 | MASC03559 | 3.03      | 3.50  | -0.18 |       |      |     |

aMPH<sub>Col</sub>, aMPH<sub>C24</sub>, Z<sub>1</sub>, Z<sub>2</sub> represent QTL for absolute mid-parent-heterosis in crosses with Col-0 or C24, augmented additive and augmented dominance effect for each trait, respectively.

<sup>a</sup> Peak gives position of the highest LOD score in the QTL region as chromosome/cM.

<sup>b</sup> SI indicates support interval with a LOD decrease of 1.0.

<sup>c</sup> Marker names closest marker to the left of the QTL region.

<sup>d</sup> LOD is the log<sub>10</sub> of the likelihood odds ratio and the test statistic.

<sup>e</sup> pR<sup>2</sup> (in %) is contribution of individual QTL to the phenotypic variation.

<sup>f</sup> Std.eff is standardized effect of the QTL i.e. effect divided by the phenotypic standard deviation of the trait. A negative value signifies an increasing effect of the Col-0 allele.

<sup>g</sup>  $R^2$  and SD give explained phenotypic variation in % and associated standard deviation obtained from the final simultaneous fit of all putative QTL in PLABQTL.
