# Supplementary material for: QTL analysis of early stage heterosis for biomass in Arabidopsis
Source: PubMed Central journal article supplement — Theor Appl Genet. 2009 Jun 7;120(2):227–37. doi: 10.1007/s00122-009-1074-6 (PMC2793381; doi:10.1007/s00122-009-1074-6), 2009-06-07
Supplement: 122_2009_1074_MOESM5_ESM.pdf [file 122_2009_1074_MOESM5_ESM.pdf]

Supplementary Table 4: Epistatic interactions identified in RILs with QTLNetwork-2.0

| trait                       | Interval_1 <sup>e</sup> | Interval_2 <sup>e</sup> | AA effect $\pm$ SE <sup>f</sup> | P-Value            | R <sup>2</sup> (%) |     |
|-----------------------------|-------------------------|-------------------------|---------------------------------|--------------------|--------------------|-----|
| per se <sup>a</sup>         | DW15 <sup>c</sup>       | 1/36-47                 | 5/41-54                         | 0.031 $\pm$ 0.010  | 0.002              | 2.0 |
|                             | LA08 <sup>d</sup>       | 1/36-43                 | 5/38-52                         | 0.226 $\pm$ 0.068  | 0.001              | 2.4 |
| Z <sub>1</sub> <sup>b</sup> | DW15 <sup>c</sup>       | 1/84-93                 | 4/4-8                           | -0.039 $\pm$ 0.017 | 0.022              | 1.0 |
|                             | LA08 <sup>d</sup>       | 1/82-93                 | 4/1-8                           | -0.175 $\pm$ 0.071 | 0.013              | 1.3 |
|                             | LA10 <sup>d</sup>       | 1/83-93                 | 4/1-8                           | -0.344 $\pm$ 0.152 | 0.024              | 1.1 |

<sup>a</sup> QTL for RIL performance *per se*

<sup>b</sup> QTL for augmented additive effect for each trait

<sup>c</sup> DW15: Shoot dry weight at 15 DAS in mg plant<sup>-1</sup>

<sup>d</sup> LAn: leaf area at n DAS in mm<sup>2</sup> plant<sup>-1</sup>

<sup>e</sup> Confidence interval of each of the two QTL involved in the digenic epistasis, given as chromosome/cM.

<sup>f</sup> Estimated additive by additive effect  $\pm$  standard error (SE); a negative value indicates an increasing effect of recombined genotypes.
