# Supplementary material for: QTL analysis of early stage heterosis for biomass in Arabidopsis
Source: PubMed Central journal article supplement — Theor Appl Genet. 2009 Jun 7;120(2):227–37. doi: 10.1007/s00122-009-1074-6 (PMC2793381; doi:10.1007/s00122-009-1074-6), 2009-06-07
Supplement: 122_2009_1074_MOESM6_ESM.pdf [file 122_2009_1074_MOESM6_ESM.pdf]

Supplementary Table 5: List of potential heterotic biomass (dry weight) QTL identified in RILs and ILs.

| RIL QTL Info        |          | IL QTL Info |                  |
|---------------------|----------|-------------|------------------|
| QTL                 | Interval | Interval    | P - value (aMPH) |
| Z <sub>2</sub>      | 1/8-16   | 1/0-17      | <0.001           |
| aMPH <sub>C24</sub> | 1/20-28  |             |                  |
|                     |          | 1/65-68     | 0.011            |
| aMPH <sub>C24</sub> | 1/84-96  | 1/72-90     | <0.001           |
|                     |          | 1/94-97     | <0.001           |
| aMPH <sub>C24</sub> | 2/42-54  | 2/39        | <0.001           |
|                     |          | 2/30-43     | <0.001           |
| Z <sub>2</sub>      | 2/52-62  | 2/61-74     | <0.001           |
|                     |          | 2/74        | <0.001           |
| Z <sub>2</sub>      | 3/32-38  | 3/20-58     | <0.001           |
| aMPH <sub>C24</sub> | 3/52-64  | 3/46-53     | <0.001           |
| Z <sub>2</sub>      | 3/58-68  | 3/46-53     | <0.001           |
|                     |          | 3/68-83     | <0.001           |
|                     |          | 3/74-79     | <0.001           |
| aMPH <sub>C24</sub> | 4/2-13   | 4/0         | <0.001           |
| aMPH <sub>Col</sub> | 4/2-6    | 4/0-14      | <0.001           |
| Z <sub>2</sub>      | 4/2-6    |             |                  |
|                     |          | 4/60-62     | <0.001           |
|                     |          | 4/64-78     | <0.001           |
|                     |          | 5/14-30     | <0.001           |
|                     |          | 5/30-44     | <0.001           |
| Z <sub>2</sub>      | 5/70-78  | 5/71-82     | <0.001           |
| aMPH <sub>C24</sub> | 5/86-94  | 5/86-93     | <0.001           |

aMPH<sub>Col</sub>, aMPH<sub>C24</sub>, Z<sub>2</sub> represent QTL for absolute mid-parent-heterosis in crosses with Col-0 or C24 and augmented dominance effect for the respective trait. Interval in the RILs indicates support interval as chromosome/cM. Interval in ILs delimits the introgressed region in the IL using the same denotation.
