# Supplementary material for: QTL analysis of early stage heterosis for biomass in Arabidopsis
Source: PubMed Central journal article supplement — Theor Appl Genet. 2009 Jun 7;120(2):227–37. doi: 10.1007/s00122-009-1074-6 (PMC2793381; doi:10.1007/s00122-009-1074-6), 2009-06-07
Supplement: 122_2009_1074_MOESM7_ESM.pdf [file 122_2009_1074_MOESM7_ESM.pdf]

Supplementary Table 6: Genetic effects from generation-means analysis and mode-of-inheritance classification for individual ILs.

| Interval | Cross   | $d_i^a$                      | $a_i^a$                      | $d_i/ a_i ^a$ | GMA <sup>b</sup> | Classification <sup>c</sup> |
|----------|---------|------------------------------|------------------------------|---------------|------------------|-----------------------------|
| 1/82-90  | C24xCol | 0.315 ± 0.061 <sup>***</sup> | 0.005 ± 0.034 <sup>ns</sup>  | 63.0          | OD               | ODO                         |
| 1/82     | C24xCol | 0.307 ± 0.061 <sup>***</sup> | 0.027 ± 0.034 <sup>ns</sup>  | 11.4          | OD               | ODO                         |
| 1/82-88  | C24xCol | 0.269 ± 0.062 <sup>**</sup>  | -0.021 ± 0.034 <sup>ns</sup> | 12.8          | OD               | ODO                         |
| 1/94-97  | C24xCol | 0.186 ± 0.062 <sup>ns</sup>  | -0.006 ± 0.034 <sup>ns</sup> | 31.0          | OD               | ODO                         |
| 3/46-53  | C24xCol | 0.267 ± 0.062 <sup>**</sup>  | 0.028 ± 0.034 <sup>ns</sup>  | 9.5           | OD               | ODO                         |
| 3/68-83  | C24xCol | 0.200 ± 0.061 <sup>ns</sup>  | -0.016 ± 0.034 <sup>ns</sup> | 12.5          | OD               | ODO                         |
| 3/74-79  | C24xCol | 0.211 ± 0.062 <sup>*</sup>   | 0.040 ± 0.034 <sup>ns</sup>  | 5.3           | OD               | ODO                         |
| 4/0      | C24xCol | 0.228 ± 0.061 <sup>*</sup>   | 0.011 ± 0.034 <sup>ns</sup>  | 20.7          | OD               | ODO                         |
| 4/0-14   | C24xCol | 0.221 ± 0.062 <sup>*</sup>   | 0.033 ± 0.034 <sup>ns</sup>  | 6.7           | OD               | ODO                         |
| 4/64-78  | C24xCol | 0.341 ± 0.061 <sup>***</sup> | -0.057 ± 0.034 <sup>ns</sup> | 6.0           | OD               | ODO                         |
| 5/71-82  | C24xCol | 0.280 ± 0.062 <sup>***</sup> | -0.137 ± 0.034 <sup>**</sup> | 2.0           | OD               | No QTL                      |
| 5/14-30  | C24xCol | 0.248 ± 0.061 <sup>**</sup>  | -0.034 ± 0.034 <sup>ns</sup> | 7.3           | OD               | ODO                         |
| 5/30-44  | C24xCol | 0.368 ± 0.061 <sup>***</sup> | -0.126 ± 0.034 <sup>*</sup>  | 2.9           | OD               | ODO                         |
| 5/86-93  | C24xCol | 0.193 ± 0.061 <sup>ns</sup>  | -0.106 ± 0.034 <sup>ns</sup> | 1.8           | OD               | recessive                   |
| 1/0-17   | ColxC24 | 0.199 ± 0.062 <sup>ns</sup>  | -0.043 ± 0.034 <sup>ns</sup> | 4.6           | OD               | ODO                         |
| 1/61-97  | ColxC24 | 0.198 ± 0.062 <sup>ns</sup>  | 0.098 ± 0.034 <sup>ns</sup>  | 2.0           | OD               | recessive                   |
| 1/93-101 | ColxC24 | 0.221 ± 0.062 <sup>*</sup>   | -0.047 ± 0.034 <sup>ns</sup> | 4.7           | OD               | ODO                         |
| 2/30-43  | ColxC24 | 0.297 ± 0.062 <sup>***</sup> | 0.034 ± 0.034 <sup>ns</sup>  | 8.7           | OD               | ODO                         |
| 2/61-74  | ColxC24 | 0.307 ± 0.062 <sup>***</sup> | 0.022 ± 0.034 <sup>ns</sup>  | 14.0          | OD               | ODO                         |
| 2/74     | ColxC24 | 0.251 ± 0.062 <sup>**</sup>  | 0.057 ± 0.034 <sup>ns</sup>  | 4.4           | OD               | ODO                         |
| 3/20-58  | ColxC24 | 0.241 ± 0.062 <sup>**</sup>  | 0.026 ± 0.034 <sup>ns</sup>  | 9.3           | OD               | ODO                         |
| 3/49-86  | ColxC24 | 0.289 ± 0.062 <sup>***</sup> | 0.201 ± 0.034 <sup>***</sup> | 1.4           | OD               | recessive                   |
| 3/49-57  | ColxC24 | 0.270 ± 0.062 <sup>**</sup>  | 0.149 ± 0.034 <sup>**</sup>  | 1.8           | OD               | recessive                   |
| 4/60-65  | ColxC24 | 0.039 ± 0.062 <sup>ns</sup>  | 0.096 ± 0.034 <sup>ns</sup>  | 0.4           | PD               | ODO                         |
| 4/60-70  | ColxC24 | 0.016 ± 0.063 <sup>ns</sup>  | 0.102 ± 0.034 <sup>ns</sup>  | 0.2           | PD               | ODO                         |
| 4/60-62  | ColxC24 | 0.174 ± 0.062 <sup>ns</sup>  | 0.097 ± 0.034 <sup>ns</sup>  | 1.8           | OD               | recessive                   |
| 5/93-end | ColxC24 | 0.065 ± 0.062 <sup>ns</sup>  | 0.179 ± 0.034 <sup>***</sup> | 0.4           | PD               | ODO                         |

Introgression is indicated as chromosome position (chromosome/cM).

<sup>a</sup>  $d_i$  denotes dominance effect;  $a_i$  indicates additive effect and  $d_i/|a_i|$  is the dominance ratio.

<sup>b</sup> Gene effect derived from generation means analysis. QTL were classified as additive (A;  $d_i/|a_i| < 0.2$ ), partially dominant (PD;  $0.2 \leq d_i/|a_i| < 0.8$ ), dominant (D;  $0.8 \leq d_i/|a_i| < 1.2$ ), and overdominant (OD;  $d_i/|a_i| \geq 1.2$ ) according to Stuber et al. (1987).

<sup>c</sup> Gene effect based on mode-of-inheritance classification. The mode-of-inheritance of a QTL was determined according to the decision tree given by Semel et al. (2006, Figure 4). If the IL

was significantly different from recurrent parent  $P_i$  and the IL-TC phenotype was between IL and  $P_i$ , we distinguished three cases: (i) if IL-TC was significantly different from IL but not from  $P_i$ , the introgressed QTL allele was considered recessive; (ii) if IL-TC differed from both parents or did not differ from either of them, the QTL effect was considered additive; and (iii) if IL-TC differed from  $P_i$  but not from IL, the introgressed QTL allele was classified as dominant. If IL-TC differed significantly from IL and  $P_i$ , the QTL was classified as overdominant (ODO).

\*\*\* \*\* \* significant at  $P < 0.001$ ,  $P < 0.01$ ,  $P < 0.05$ , respectively

<sup>ns</sup> not significant
